# Supplementary material for: Coevolution Theory of the Genetic Code at Age Forty: Pathway to Translation and Synthetic Life
Source: PubMed Central journal article supplement (PMC4810243; doi:10.3390/life6010012), 2016-03-16
Supplement: life-06-00012-s001.pdf [file life-06-00012-s001.pdf]

# Supplementary Materials: Coevolution Theory of the Genetic Code at Age Forty: Pathway to Translation and Synthetic Life

J. Tze-Fei Wong, Siu-Kin Ng, Wai-Kin Mat, Taobo Hu and Hong Xue

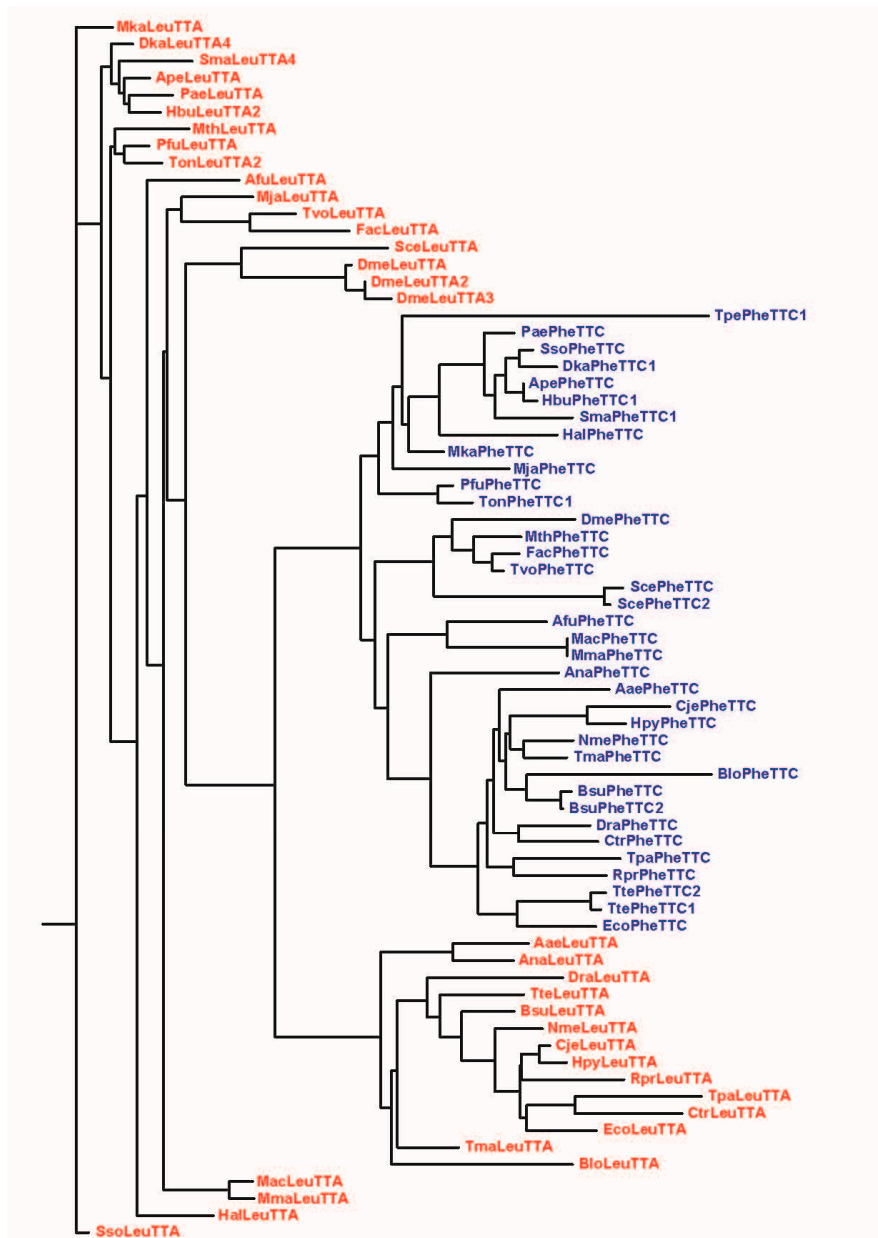

(A)

Figure S1. Cont.

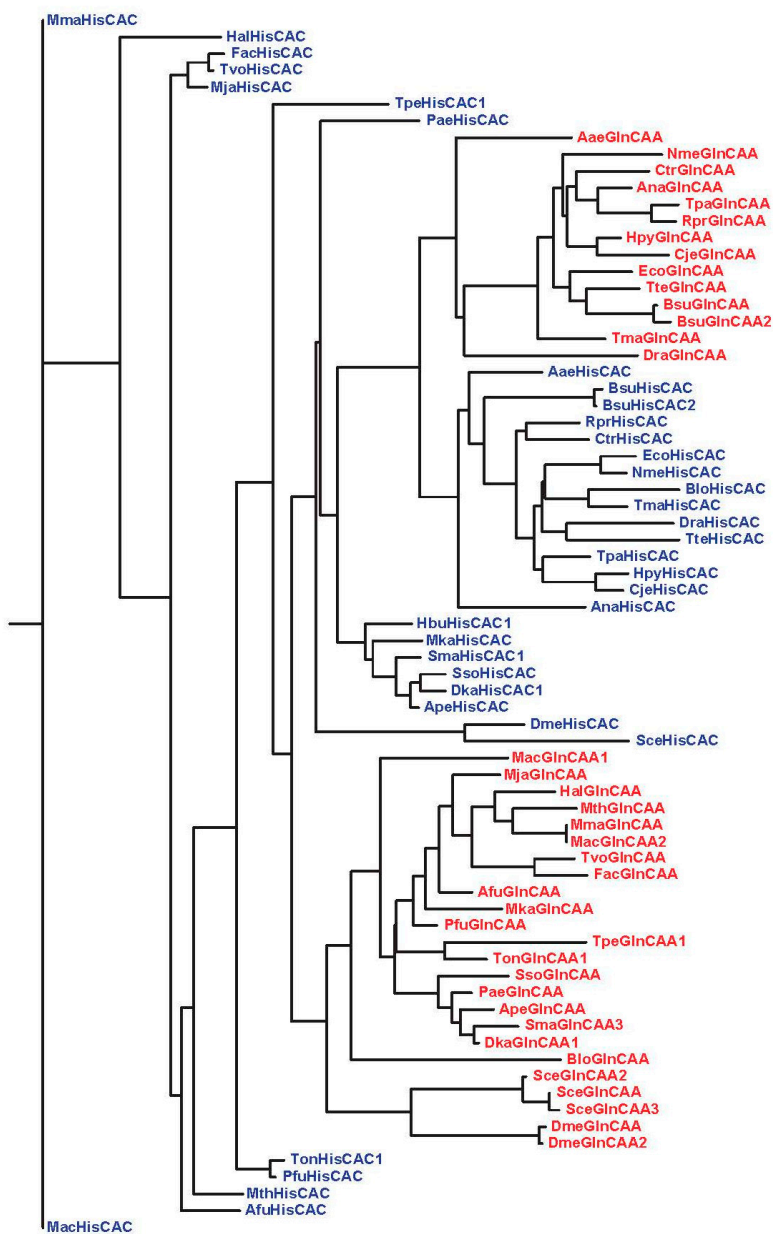

(B)

Figure S1. Cont.

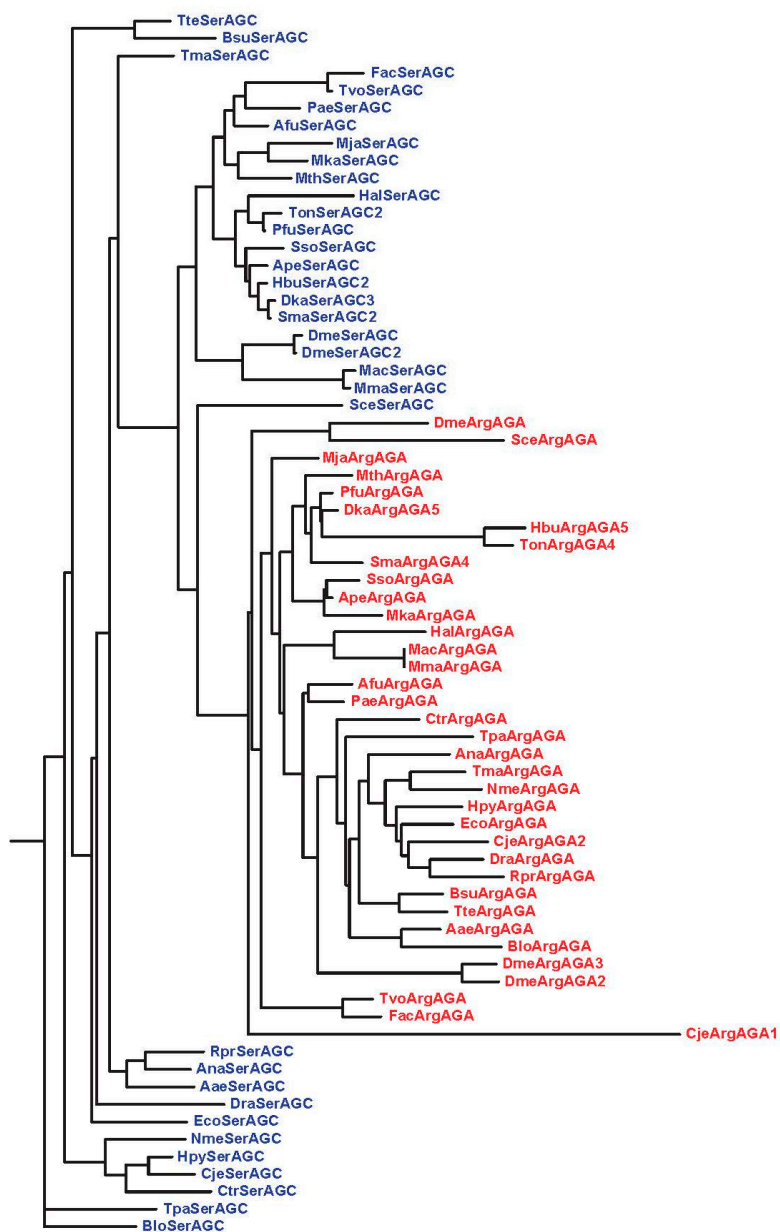

(C)

**Figure S1.** Gene trees for tRNAs bearing GNN and UNN anticodons. (A) UUN codon box for Phe/Leu; (B) CAN codon box for His/Gln; and (C) AGN codon box for Ser/Arg.





|           |                                                                              |    |
|-----------|------------------------------------------------------------------------------|----|
| RsoAspGAC | GGAGTGGTAGTTCAGTCCGTTAGAAACCGGCCCTGTCACCGCGGGGGCGCGGGTTCGAGTCCCGTCCACTCCG    | 73 |
| RsoGluGAA | GTCCCTTCGCTAGAGGCCCTAGGACATCAACCCCTTCAAGGTCAGTACAGGGGTTCGAATCCCCTAGGGGACC    | 73 |
| Δ=34      | 1.....10.....20.....30.....40.....50.....60.....70...                        |    |
| ScoAspGAC | GGTCCCT---GTGGAGCAGTTGGAGTCTCGCCACCCCTGTCAAAGTGGAGCGCGGGTTCAAAATCCCGTACGACCG | 74 |
| ScoGluGAA | -GCCCTCATCGTCTAGCGGCCCTAGGA---GCCCGCCCTTCAAGGGGTAGCAAGGGTTCGAATCCCCTAGGGGACC | 73 |
| Δ=30      | 1.....10.....20.....30.....40.....50.....60.....70.....                      |    |
| SpnAspGAC | GGTCCCGTAGTGTAGCGGTTATCACTGCCCTGTCACGGCGAAGACCGGGTTCGATTCCCGTCCGGACCG        | 72 |
| SpnGluGAA | GGTCCCTTCGCTAGAGGGGTTAAGACACCCGCTTTTACGGCGGTAAACAGGGTTCGAATCCCGTACGCACTA     | 72 |
| Δ=21      | 1.....10.....20.....30.....40.....50.....60.....70..                         |    |
| StyAspGAC | GGAGCGGTAGTTCAGTTGGTTAGAAACCTGCCCTGTCACCGAGGGGGCGCGGGTTCGAGTCCCGTCCGTTCCG    | 73 |
| StyGluGAA | GTCCCTTCGCTAGAGGCCCTAGGACACCGCCCTTTCACGGCGGTAAACAGGGTTCGAATCCCCTAGGGGACC     | 73 |
| Δ=32      | 1.....10.....20.....30.....40.....50.....60.....70...                        |    |
| SynAspGAC | GGGTCGTAGTTCAGTTGGTTAGAGCACCGCCCTGTCACGGCGAAGTCCGGGTTCGAGCCCCCTCAGACCCG      | 73 |
| SynGluGAA | GCCCCATCGCTAGAGGCCCTAGGACACTCCCTTTCACGGAGGCGACAGGGATTCCAATCCCTTCCCTAGGGGACC  | 73 |
| Δ=36      | 1.....10.....20.....30.....40.....50.....60.....70...                        |    |
| TelAspGAC | GGGAGCGTAGTTCAGTTGGTTAGAGCACCGCCCTGTCACGGCGAAGTCCGGGTTCGAGCCCCCTCAGACCCG     | 73 |
| TelGluGAA | GCCCCATCGCTAGTGGCCCTAGGACACTCCCTTTCACGGAGGCGACAGGGATTCCAATCCCTTCCCTAGGGGACC  | 73 |
| Δ=35      | 1.....10.....20.....30.....40.....50.....60.....70...                        |    |
| TmaAspGAC | GGGAGCGTAGTTCAGTTGGTTAGAGCACCGCCCTGTCACCGCGAAGTCCGGGTTCGAGCCCCCTCAGACCCG     | 74 |
| TmaGluGAA | GCCCCATCGCTAGGATTAAC--GCCAGTCCCGGATTTCAGTCCGGAGTCCGGGTTCGATTCCCGTCGGGGTCC    | 72 |
| Δ=34      | 1.....10.....20.....30.....40.....50.....60.....70...                        |    |
| TpaAspGAC | GGGGCGTAGTTCAGTTGGTTAGAGCACCGCCCTGTCACCGCGAAGTCCGGGTTCGAGCCCCCTCAGACCCG      | 73 |
| TpaGluGAA | GGTCCCTTCGCTA--TCGGTTAGAGCAGAGATTCTCAATCTCAAAAGACGGGTTCGAATCCCGTACGGGACC     | 72 |
| Δ=36      | 1.....10.....20.....30.....40.....50.....60.....70...                        |    |
| TteAspGAC | GGCCCGTAGTTCAGTTGGTTAGAGCACCGCCCTGTCACCGGTGGAGGCGAGGGTTCGAATCCCGTCCGGTCCG    | 73 |
| TteGluGAA | GCCCCATCGCTAGTGGCCCTAGGACACTCCCTTTCACGGCGGTAAACATGGGTTCGAATCCCCTAGGGGACC     | 72 |
| Δ=24      | 1.....10.....20.....30.....40.....50.....60.....70...                        |    |
| VchAspGAC | GGAGCGGTAGTTCAGTTGGTTAGAAACCGGCCCTGTCACCGCGGGGGCGCGGGTTCGAGTCCCGTCCGCTCCG    | 73 |
| VchGluGAA | GTCCCTTCGCTAGAGGCCCTAGGACACCGCCCTTTCACGGCGGTAAACAGGGTTCGAATCCCGTACGGGATTA    | 73 |
| Δ=29      | 1.....10.....20.....30.....40.....50.....60.....70...                        |    |
| XcaAspGAC | GGAGCGGTAGTTCAGTTGGTTAGAAACCGGCCCTGTCACCGCGGGGGCGCGGGTTCGAGTCCCGTCCGCTCCG    | 73 |
| XcaGluGAA | GTCCCTTCGCTAGAGGCCCTAGGACACCAACCCCTTTCACGGTGGACAGGGGGTTCGAATCCCGTACGGGACC    | 73 |
| Δ=33      | 1.....10.....20.....30.....40.....50.....60.....70...                        |    |
| XfaAspGAC | GGAGCGGTAGTTCAGTTGGTTAGAAACCGGCCCTGTCACCGCGGGGGCGCGGGTTCGAGTCCCGTCCGCTCCG    | 73 |
| XfaGluGAA | GTCCCTTCGCTAGAGGCCCTAGGACATCAACCCCTTTCACGGTGGGACAGGGGGTTCGAATCCCGTACGGGACC   | 73 |
| Δ=34      | 1.....10.....20.....30.....40.....50.....60.....70...                        |    |

Eukarya : Average Δ = 24.3

|           |                                                                            |    |
|-----------|----------------------------------------------------------------------------|----|
| AthAspGAC | GTCTGTAGTATAGTGGTAAATATCCCGCCCTGTCACCGGGGTGACCCGGGTTCGATCCCGGGGAAAGGGGG    | 72 |
| AthGluGAA | TCCGATCGTCCAGCGGTTAGGATATCTGGCTTTCACCAAGGAGACCCGGGTTCGATTCGGGCAATGGGAG     | 72 |
| Δ=20      | 1.....10.....20.....30.....40.....50.....60.....70..                       |    |
| CelAspGAC | TCCCTCGTAGTATAGTGGTGGTATCCCGCCTGTCACAGTCCGAGACCCGGGTTCGAATCCCGGGCCGGGAG    | 72 |
| CelGluGAA | TCCCATGTTGGTCTAGTGGTTAGGATTCGTTTTCACCAAGGCGCCCGGGTTCGATTCGGGCAATGGGAA      | 72 |
| Δ=21      | 1.....10.....20.....30.....40.....50.....60.....70..                       |    |
| DmeAspGAC | TCCCTCGTAGTATAGTGGTGGTATCCCGCCTGTCACAGTCCGAGACCCGGGTTCGAATCCCGGGCCGGGAG    | 72 |
| DmeGluGAA | TCCCATGTTGGTCTAGTGGTTAGGATTCGTTTTCACCAAGGCGCCCGGGTTCGATTCGGGCAATGGGAA      | 72 |
| Δ=22      | 1.....10.....20.....30.....40.....50.....60.....70..                       |    |
| EcuAspGAC | TCTTCCATAGTCTAGTGGTATATCAATCCCGCCTGTCACCGGGGTGACCCGGGTTCGAATCCCG-GTGGGAGAG | 73 |
| EcuGluGAA | TTCCTACTGGTCTAGCGGT-TAGGATGCTCCCTTTCACCAAGGAGGTTGGGGTTCGAATCCCGCGTAGGGAA-  | 72 |
| Δ=28      | 1.....10.....20.....30.....40.....50.....60.....70...                      |    |
| HsaAspGAC | TCCCTCGTAGTATAGTGGTGGTATCCCGCCTGTCACAGTCCGAGACCCGGGTTCGAATCCCGGACGGGAG     | 72 |
| HsaGluGAA | TCCCTGGTGGTCTAGTGGTTAGGATTCGGCGCTTCACCGGGGACCCGGGTTCGATTCGGGCAATGGGAA      | 72 |
| Δ=24      | 1.....10.....20.....30.....40.....50.....60.....70..                       |    |
| SceAspGAC | TCCGTGATAGTTAATGGTCAGAAAGGGCGCTGTCGCGTCCGAGATCCGGGTTCGAATCCCGGTCGGGAG      | 72 |
| SceGluGAA | TCCGATATAGTAAACGGCTATCATCATCCCTTTCACCGTGGAGACCCGGGTTCGACTCCCGGTAATGGGAG    | 72 |
| Δ=23      | 1.....10.....20.....30.....40.....50.....60.....70...                      |    |
| SpoAspGAC | TCTCCTTAGTATAGGGG-TAGTACACAAGCCTGTCACCGTTCGAGCCCGGGTTCGAATCCCGGAGGGAGAG    | 71 |
| SpoGluGAA | TCCGTTGGTCCAAACGGCTAGGATTCGTCGCTTTCACCAAGCGGTTCGGGTTCGACTCCCGGCAACGGAG     | 72 |
| Δ=32      | 1.....10.....20.....30.....40.....50.....60.....70..                       |    |

(A)

Figure S2. Cont.

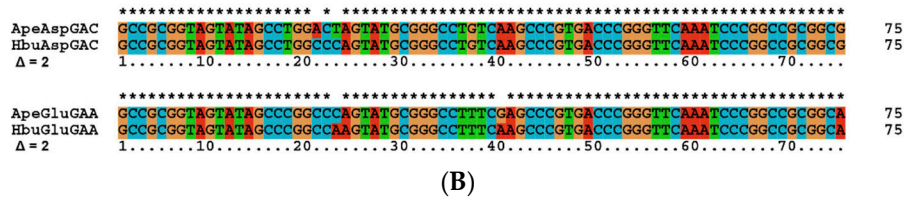

**Figure S2. Sequence alignments of AspGAC and GluGAA genes from different species. (A)** Sequence alignments from different species. The archaeal, bacterial and eukaryotic species aligned comprise species from Figure 4 and reference [83]. **(B)** Sequence alignments between ApeAspGAC and HbuAspGAC, and between ApeGluGAA and HbuGluGAA.  $\Delta$  represents number of base differences between a pair of aligned genes. Three-letter names for species additional to those included in Figure 4 are: **ARCHAEA.** Mba *Methanosarcina barkeri*, Pab *Pyrococcus abyssi*, Pho *Pyrococcus horikoshii*, Sto *Sulfolobus tokodaii*, Tac *Thermoplasma acidophilum*. **BACTERIA.** Atu *Agrobacterium tumefaciens*, Bap *Buchnera aphidicola*, Bbu *Borrelia burgdorferi*, Cac *Clostridium acetobutylicum*, Ccr *Caulobacter crescentus*, Hin *Haemophilus influenzae*, Lin *Listeria innocua*, Lla *Lactococcus lactis*, Mpn *Mycoplasma pneumoniae*, Mtu *Mycobacterium tuberculosis*, Psa *Pseudomonas aeruginosa*, Rso *Ralstonia solanacearum*, Sco *Streptomyces coelicolor*, Spn *Streptococcus pneumoniae*, Sty *Salmonella typhi*, Syn *Synechocystis 6803*, Tel *Thermosynechococcus elongatus*, Vch *Vibrio cholerae*, Xca *Xanthomonas campestris*, Xfa *Xylella fastidios*. **EUKARYA.** Ath *Arabidopsis thaliana*, Cel *Caenorhabditis elegans*, Ecu *Encephalitozoon cuniculi*, Hsa *Homo sapiens*, Spo *Schizosaccharomyces pombe*.

**Archaea : Average  $\Delta = 17.7$**

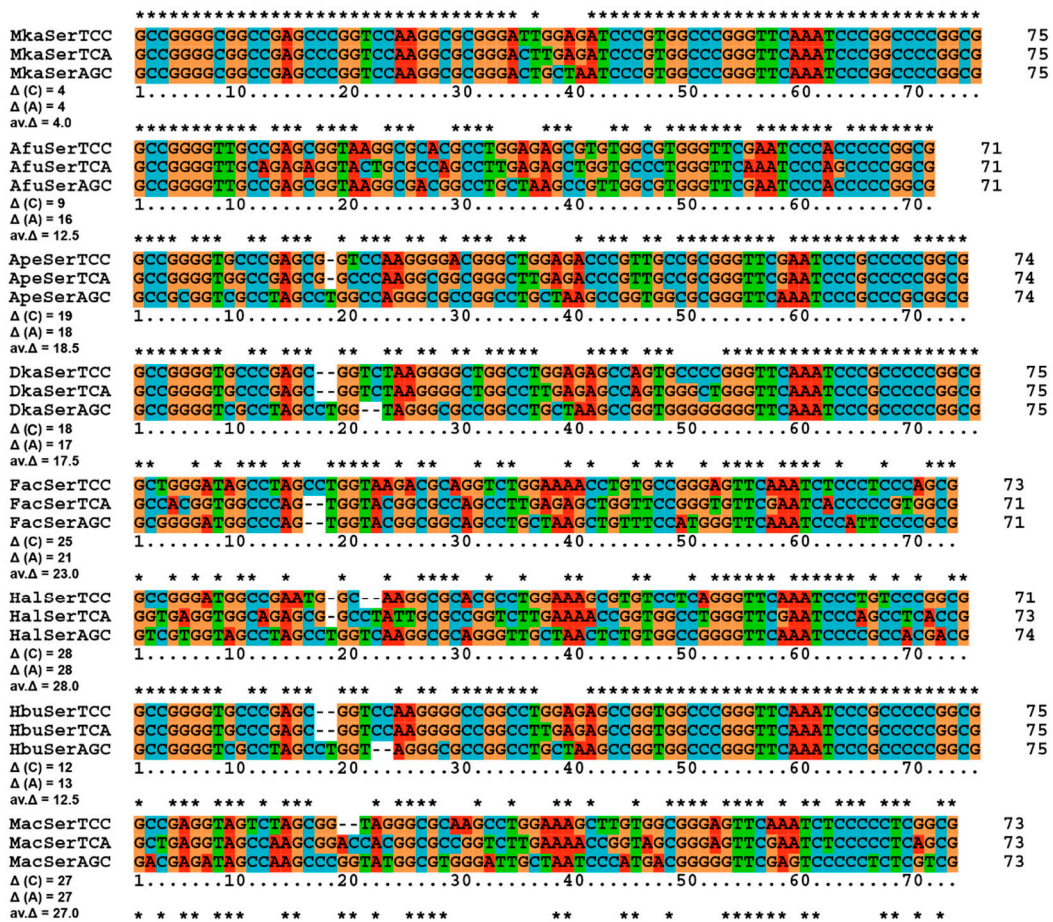

**Figure S3. Cont.**

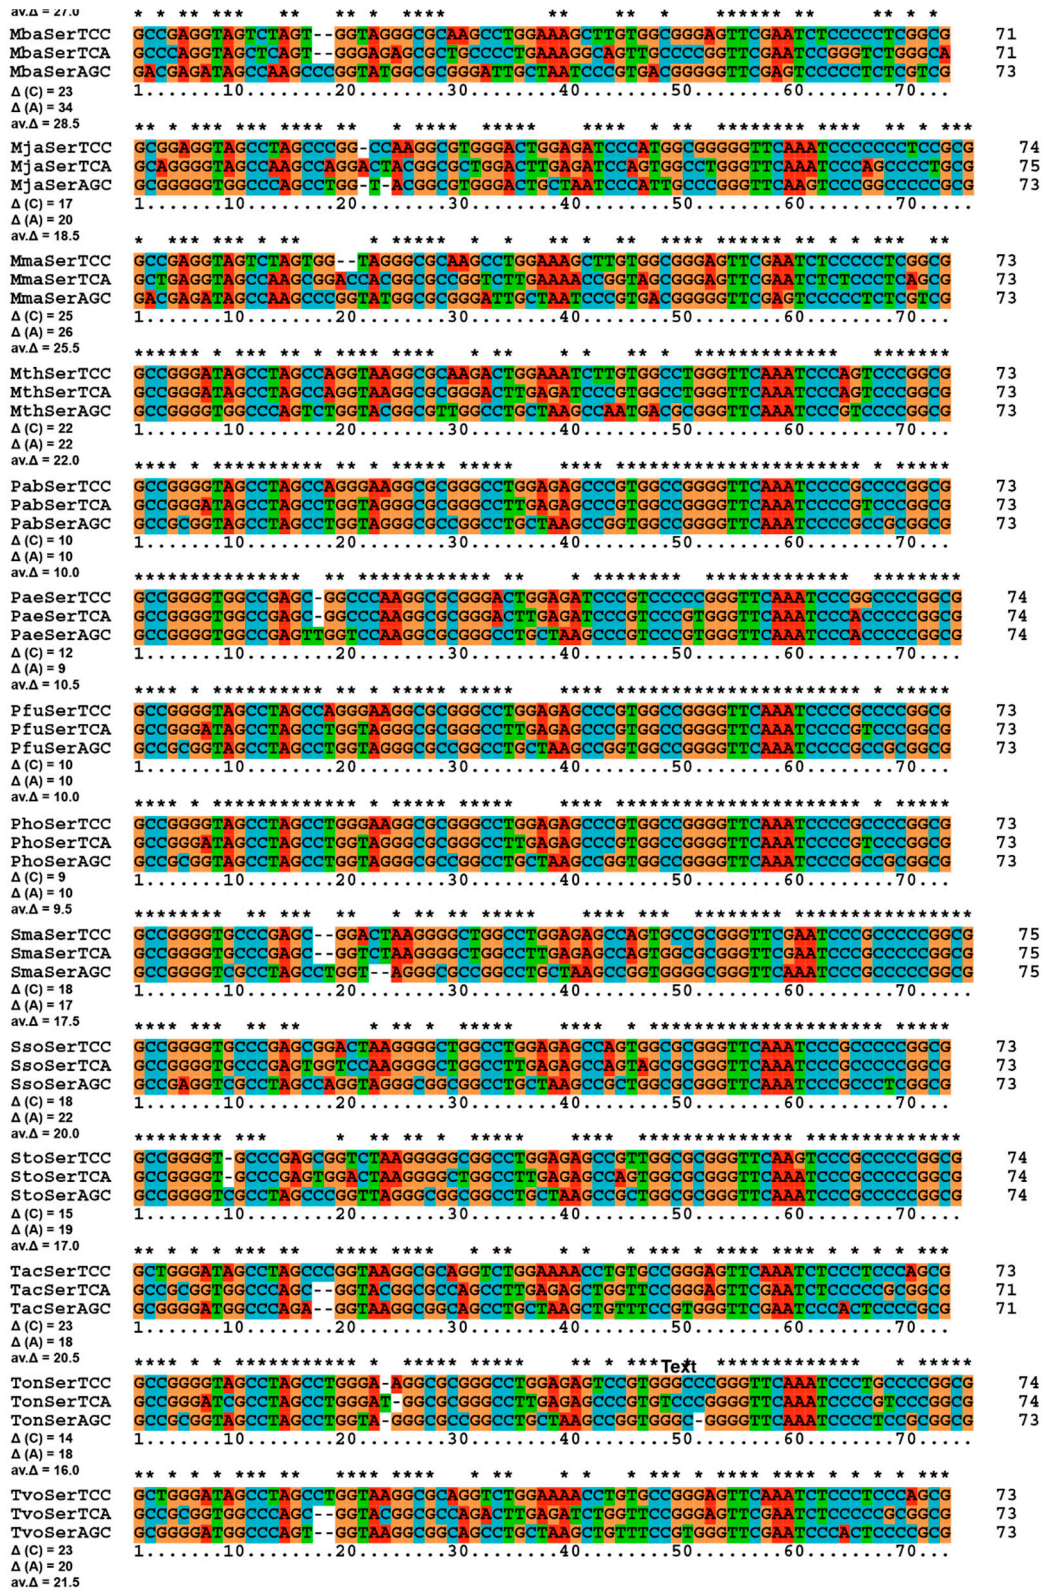

Figure S3. Cont.



### Bacteria : Average Δ = 22.3

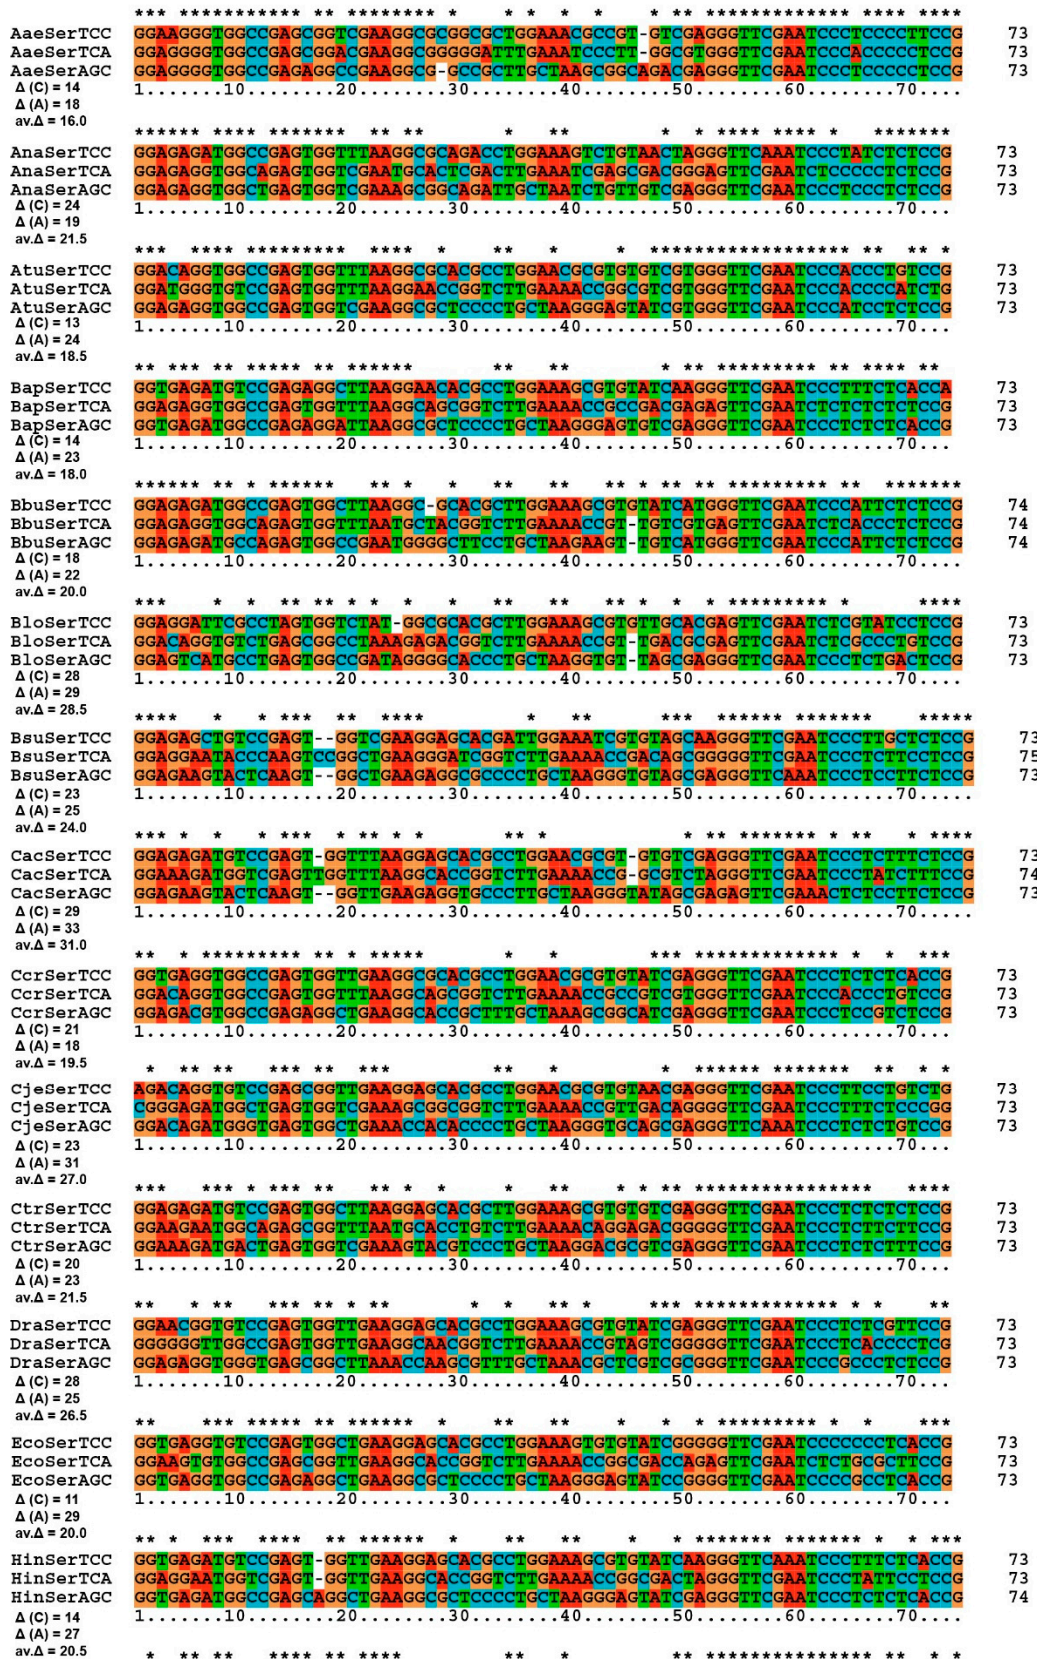

Figure S3. Cont.

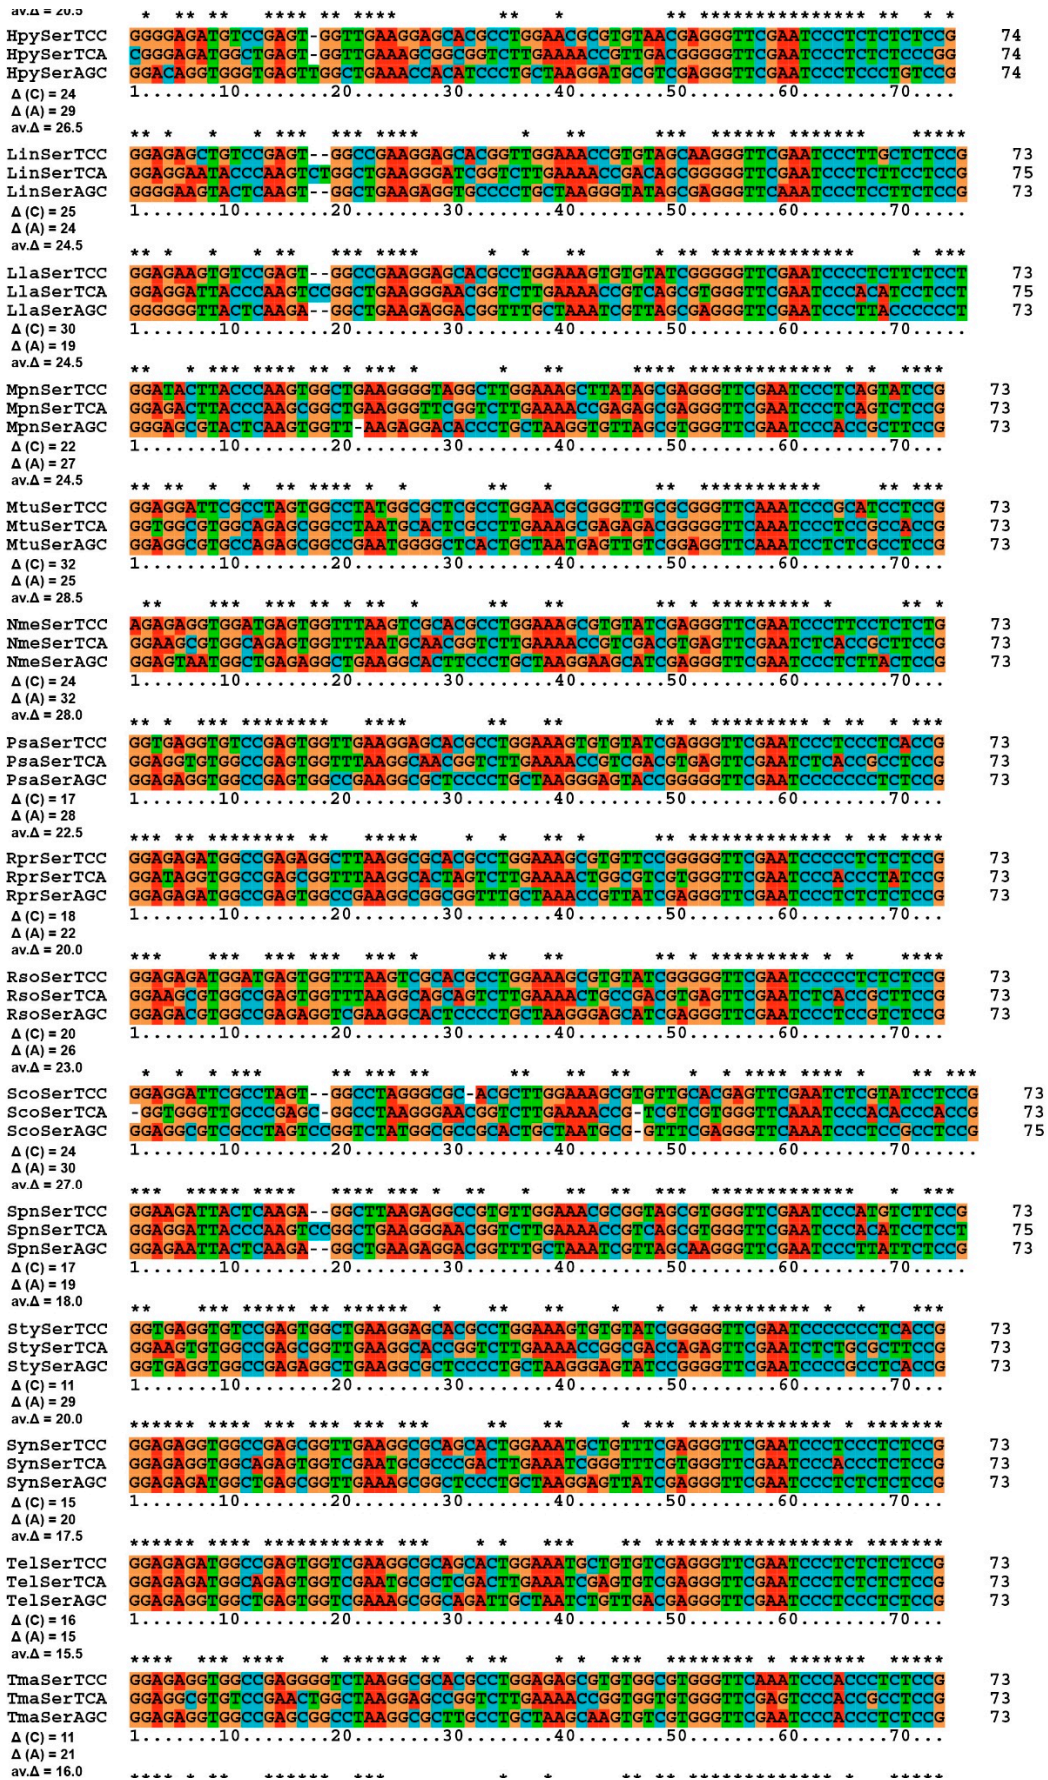

Figure S3. Cont.
